# Supplementary material for: Self-supported CoFe LDH/Co0.85Se nanosheet arrays as efficient electrocatalysts for the oxygen evolution reaction
Source: Royal Society of Chemistry journal article supplement (doi:10.1039/c9cy01440c), 2019-01-01
Supplement: c9cy01440c1.pdf [file c9cy01440c1.pdf]

## Supporting information

### **Self-Supported CoFe LDH/Co<sub>0.85</sub>Se Nanosheet Arrays as Efficient**

### **Electrocatalysts for Oxygen Evolution Reaction**

Weiyang Jin,<sup>a,b</sup> Fang Liu,<sup>a,b</sup> Xiaoliang Guo,<sup>a,b</sup> Jun Zhang,<sup>\*a,b</sup> Lekai Zheng,<sup>a,b</sup>

Yongchuan Hu,<sup>a,b</sup> Jing Mao,<sup>c,d</sup> Hui Liu,<sup>\*a</sup> Yanming Xue,<sup>a,b</sup> Chengchun Tang<sup>a,b</sup>

<sup>a</sup> School of Material Science and Engineering, Hebei University of Technology,  
Dingzigu Road 1, Tianjin 300130, P. R. China

<sup>b</sup> Hebei Key Laboratory of Boron Nitride Micro and Nano Materials, Guangrongdao  
Road 29, Tianjin 300130, P. R. China

<sup>c</sup> School of Materials Science and Engineering, Tianjin University, Tianjin Haihe  
Education Park, Tianjin 300072, PR China

<sup>d</sup> Center for functional materials, Brookhaven National Laboratory, Suffolk County,  
City of New York 11973, USA

**E-mail address:** junnano@gmail.com (J. Zhang). liuhuihebut@163.com (H. Liu)

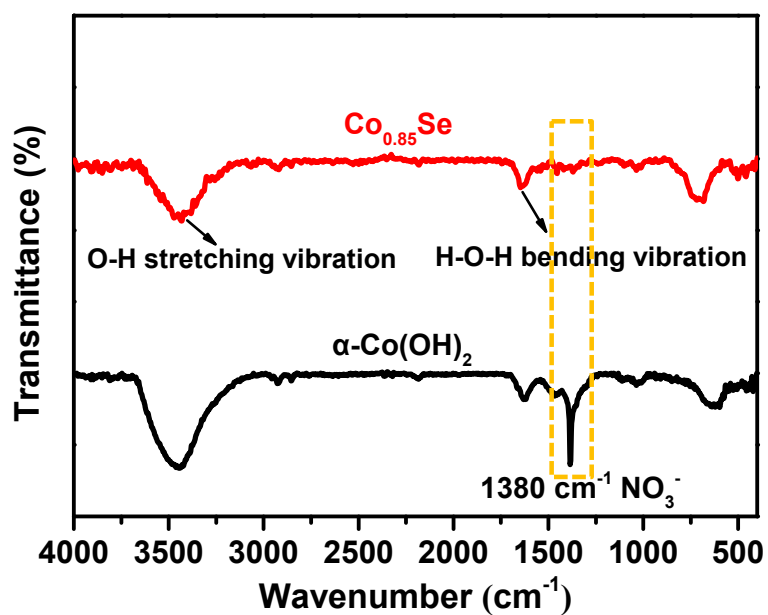

**Figure S1.** The FTIR spectra of  $\alpha$ -Co(OH)<sub>2</sub> and Co<sub>0.85</sub>Se.

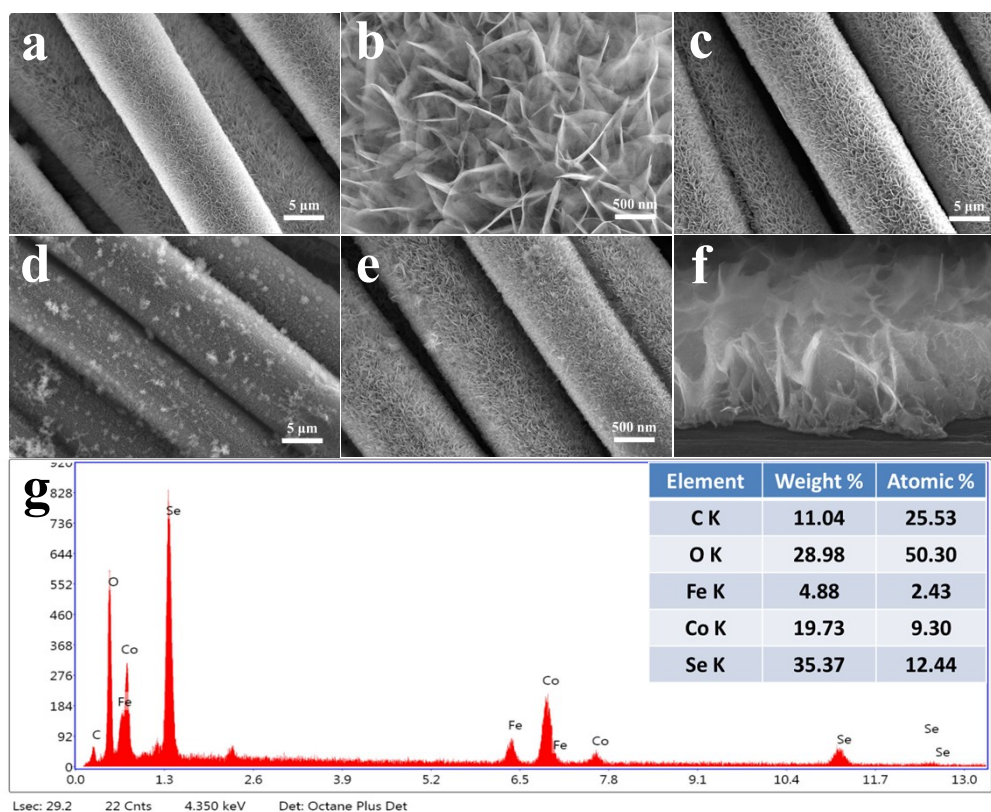

**Figure S2.** (a, b) The SEM images of  $\alpha$ -Co(OH)<sub>2</sub>/CC, (c) the low resolution SEM image of Co<sub>0.85</sub>Se/CC, (d) the SEM image of CoFe LDH/CC (e-f) the low resolution

SEM image of CoFe LDH/Co<sub>0.85</sub>Se/CC and its edgea and (g) EDS spectra for CoFe LDH/Co<sub>0.85</sub>Se/CC.

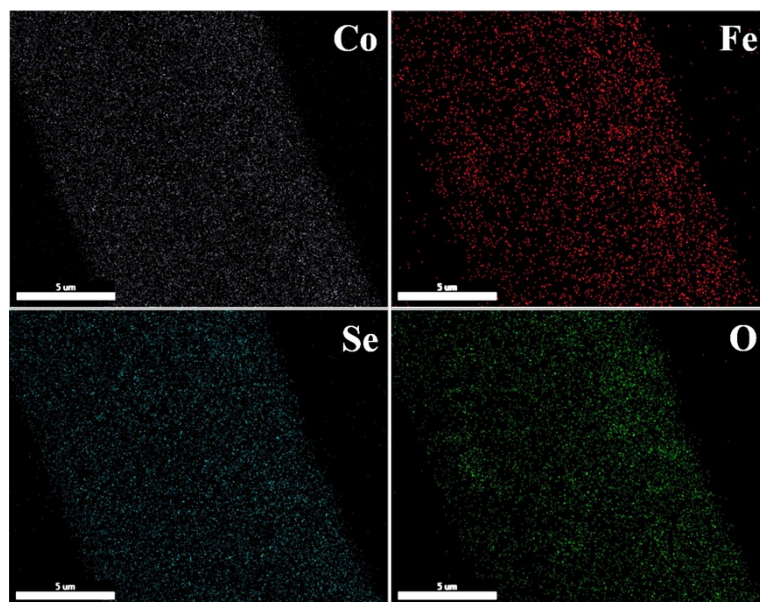

Figure S3. The elemental mappings of CoFe LDH /Co<sub>0.85</sub>Se/CC.

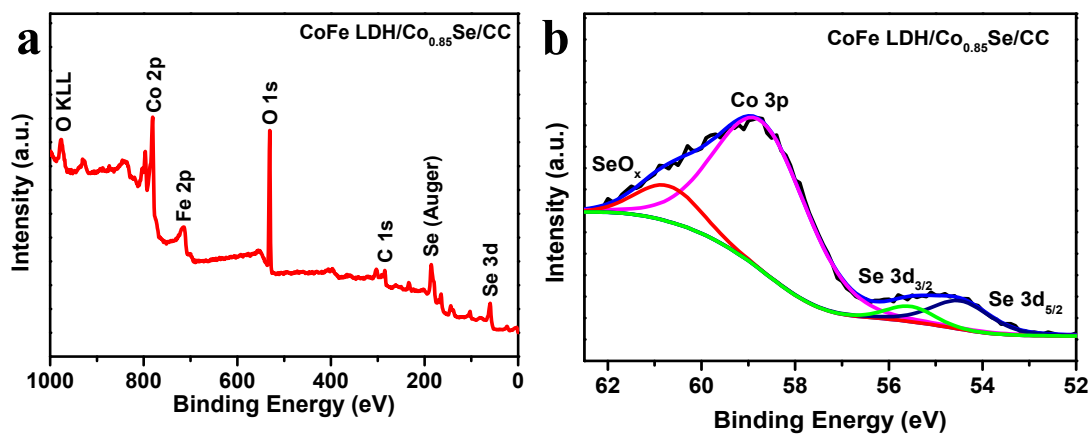

Figure S4. (a) XPS survey spectrum and (b) Se 3d spectra of CoFe LDH/Co<sub>0.85</sub>Se/CC.

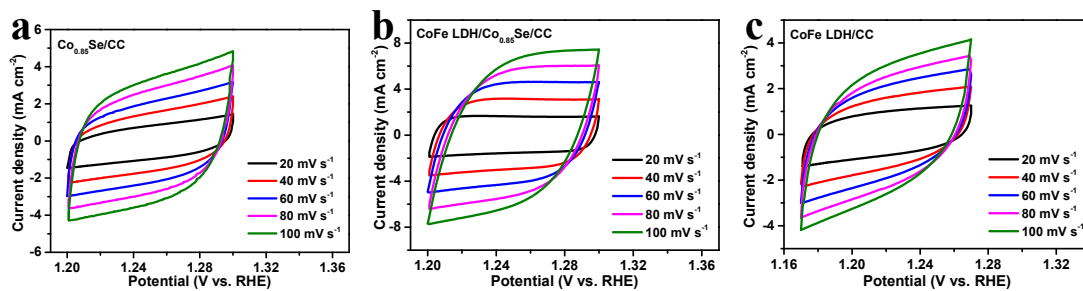

**Figure S5.** Different scan rates of CV of (a) Co<sub>0.85</sub>Se/CC, (b) CoFe LDH/Co<sub>0.85</sub>Se/CC, (c) CoFe LDH/CC for OER.

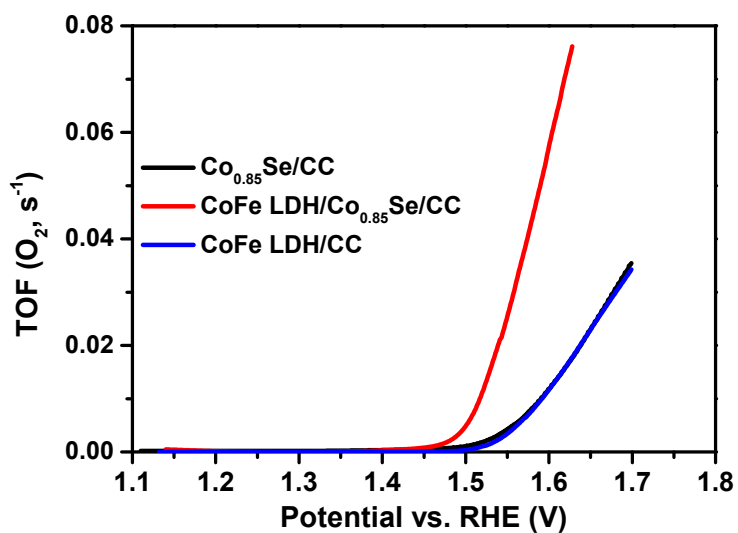

**Figure S6.** TOF values of the as-made Co<sub>0.85</sub>Se/CC, CoFe LDH/Co<sub>0.85</sub>Se/CC, and CoFe LDH/CC at different potentials.

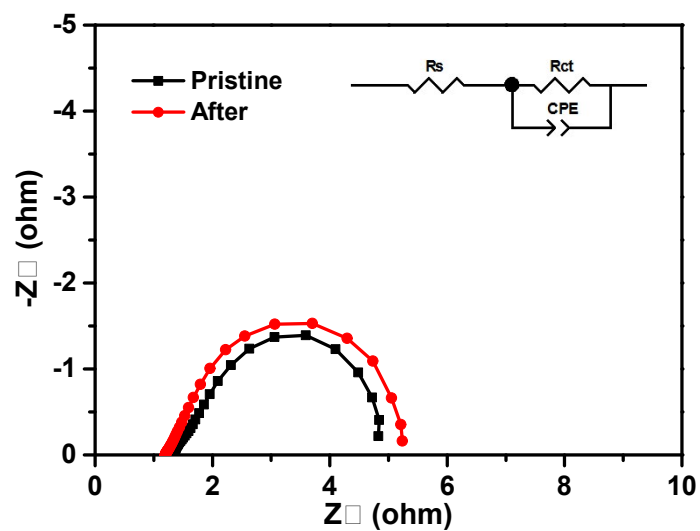

**Figure S7.** Nyquist plots of the CoFe LDH/Co<sub>0.85</sub>Se/CC before and after long term OER in 10 mA cm<sup>-2</sup> for 40 h.

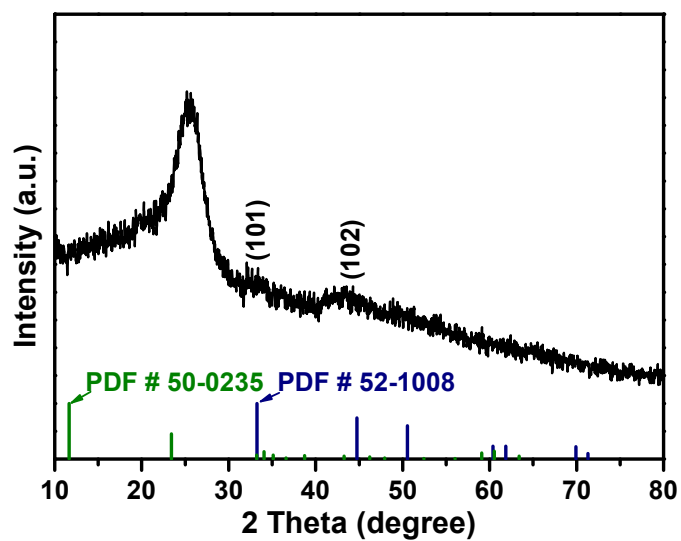

**Figure S8.** (a) The XRD pattern of CoFe LDH/Co<sub>0.85</sub>Se/CC after long term OER in 10 mA cm<sup>-2</sup> for 40 h.

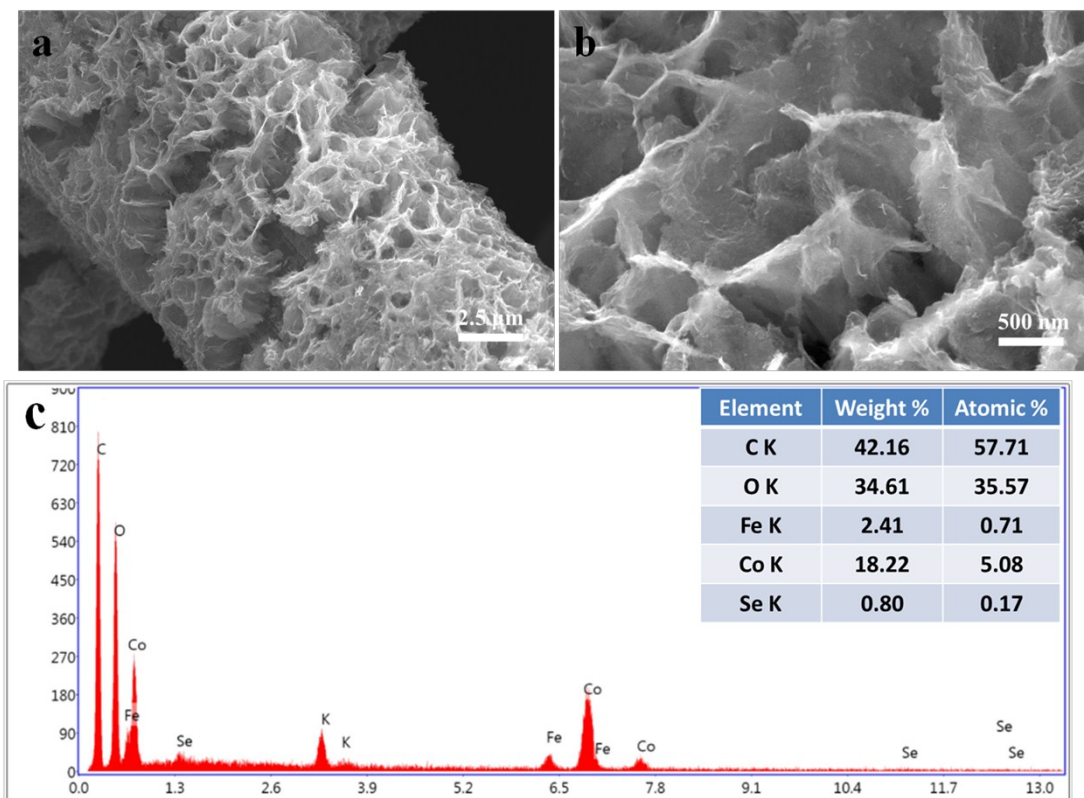

**Figure S9.** (a, b) The SEM image and (c) EDS spectra of CoFe LDH/Co<sub>0.85</sub>Se/CC after long term OER in 10 mA cm<sup>-2</sup> for 40 h.

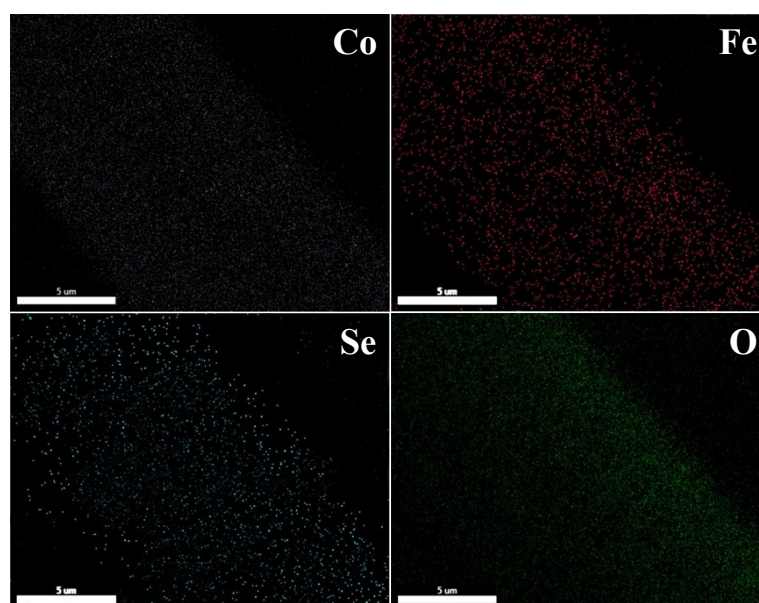

**Figure S10.** The elemental mappings of CoFe LDH /Co<sub>0.85</sub>Se/CC after long term OER in 10 mA cm<sup>-2</sup> for 40 h.

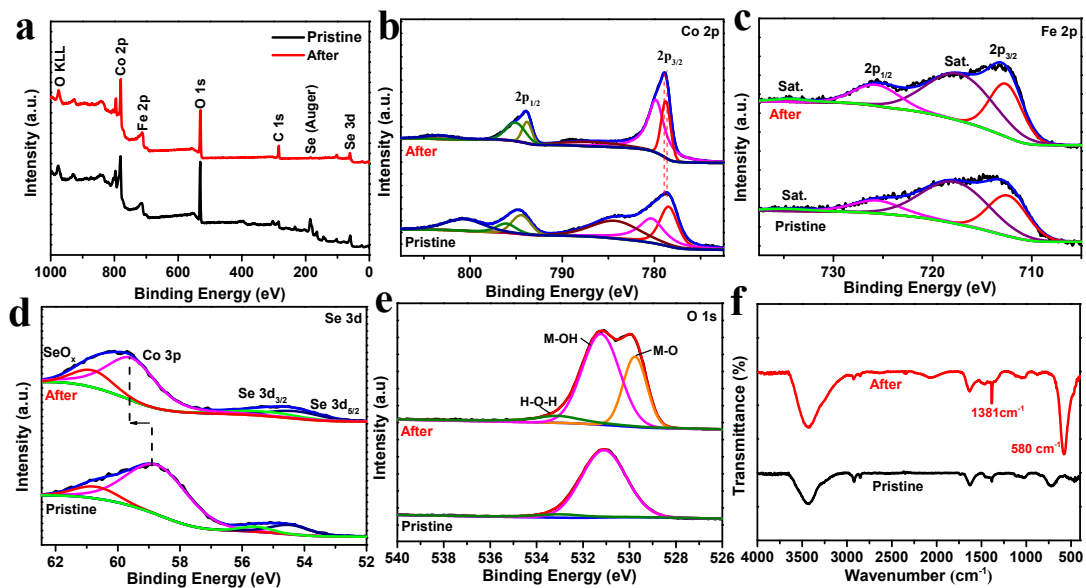

**Figure S11.** (a) XPS survey spectra, (b) Co 2p, (c) Fe 2p, (d) Se 3d, (e) O 1s and (f) FTIR spectra of CoFe LDH/Co<sub>0.85</sub>Se/CC after long term OER in 10 mA cm<sup>-2</sup> for 40 h.

**Table S1.** Comparison of BET surface area of samples.

| Catalyst                          | Specific surface area (m <sup>2</sup> g <sup>-1</sup> ) |
|-----------------------------------|---------------------------------------------------------|
| Co <sub>0.85</sub> Se/CC          | 4.379                                                   |
| CoFe LDH/CC                       | 4.379                                                   |
| CoFe LDH/Co <sub>0.85</sub> Se/CC | 4.876                                                   |

**Table S2.** Comparison of OER performances of CoFe LDH/Co<sub>0.85</sub>Se/CC with previously reported non-precious metal OER electrocatalysts.

| Catalyst                                     | Substrate        | Electrolyte | J<br>(mA cm <sup>-2</sup> ) | η<br>(mV vs RHE) | Tafel slope<br>(mV dec <sup>-1</sup> ) | Ref.         |
|----------------------------------------------|------------------|-------------|-----------------------------|------------------|----------------------------------------|--------------|
| CoFe LDH/Co <sub>0.85</sub> Se               | CC <sup>a</sup>  | 1M KOH      | 10<br>300                   | 241<br>355       | 48                                     | This<br>work |
| CoFe LDH                                     | GCE <sup>b</sup> | 1M KOH      | 10                          | 286              | 45                                     | 1            |
| Co <sub>0.85</sub> Se/NC                     | GCE              | 1M KOH      | 10                          | 320              | 75                                     | 2            |
| CoFe-oxyhydroxide                            | CP <sup>c</sup>  | 1M KOH      | 10                          | 330              | 37                                     | 3            |
| C@NiCo Nw                                    | CC               | 1M KOH      | 10                          | 302              | 43.6                                   | 4            |
| CoFe DH/NCNTs                                | GCE              | 1M KOH      | 10                          | 270              | 56.88                                  | 5            |
| SnCoFe hydroxide -Ar<br>plasma               | NF <sup>d</sup>  | 1M KOH      | 10                          | 270              | -                                      | 6            |
| Ultrathin CoFe LDH<br>with vacancies         | GCE              | 1M KOH      | 10<br>50                    | 266<br>313       | 37.85                                  | 7            |
| Ultrathin CoFe LDH                           | GCE              | 1M KOH      | 10                          | 270              | 58.3                                   | 8            |
| Co <sub>3</sub> O <sub>4</sub> /Co-Fe oxide  | GCE              | 1M KOH      | 10                          | 297              | 61                                     | 9            |
| NiFe LDH /Co <sub>0.85</sub> Se              | EGF <sup>e</sup> | 1M KOH      | 150                         | 270              | 57                                     | 10           |
| CoFe LDH/CoFe alloy                          | GCE              | 1M NaOH     | 10                          | 286              | 48                                     | 11           |
| Ag-CoSe <sub>2</sub> Nanobelts               | GCE              | 0.1M KOH    | 10                          | 320              | 56                                     | 12           |
| α-Co <sub>4</sub> Fe(OH) <sub>x</sub>        | GCE              | 1M KOH      | 10                          | 295              | 52                                     | 13           |
| CoS-Co(OH) <sub>2</sub> @aMoS <sub>2+x</sub> | NF               | 1M KOH      | 10                          | 380              | 68                                     | 14           |
| CoFe <sub>2</sub> O <sub>4</sub> Ns          | GCE              | 0.1M KOH    | 10                          | 308              | 36.8                                   | 15           |

CC<sup>a</sup>: Carbon cloth

GCE<sup>b</sup>: Glassy carbon electrode

CP<sup>c</sup>: Carbon paper

NF<sup>d</sup>: Ni foam

EGF<sup>e</sup>: Exfoliated graphene foil



## Reference

1. L. Han, C. Dong, C. Zhang, Y. Gao, J. Zhang, H. Gao, Y. Wang and Z. Zhang, *Nanoscale*, 2017, **9**, 16467-16475.
2. T. Meng, J. Qin, S. Wang, D. Zhao, B. Mao and M. Cao, *J. Mater. Chem. A*, 2017, **5**, 7001-7014.
3. M. Xiong and D. G. Ivey, *Electrochim. Acta*, 2018, **260**, 872-881.
4. S.-H. Bae, J.-E. Kim, H. Randriamahazaka, S.-Y. Moon, J.-Y. Park and I.-K. Oh, *Adv. Energy Mater.*, 2017, **7**, 1601492.
5. Y. Liu, Y. Hu, P. Ma, F. Li, F. Yuan, S. Wang, Y. Luo and J. Ma, *ChemSusChem*, 2019, **12**, 2679-2688.
6. D. Chen, M. Qiao, Y.-R. Lu, L. Hao, D. Liu, C.-L. Dong, Y. Li and S. Wang, *Angew. Chem. Int. Ed.*, 2018, **57**, 8691-8696.
7. Y. Wang, Y. Zhang, Z. Liu, C. Xie, S. Feng, D. Liu, M. Shao and S. Wang, *Angew. Chem. Int. Ed.*, 2017, **56**, 5867-5871.
8. H. Yuan, Y. Wang, C. Yang, Z. Liang, M. Chen, W. Zhang, H. Zheng and R. Cao, *ChemPhysChem*, 2019.
9. X. Wang, L. Yu, B. Y. Guan, S. Song and X. W. Lou, *Adv. Mater.*, 2018, **30**, 1801211.
10. Y. Hou, M. R. Lohe, J. Zhang, S. Liu, X. Zhuang and X. Feng, *Energy Environ. Sci.*, 2016, **9**, 478-483.
11. A. M. P. Sakita, R. D. Noce, E. Vallés and A. V. Benedetti, *Appl. Surf. Sci.*, 2018, **434**, 1153-1160.
12. X. Zhao, H. Zhang, Y. Yan, J. Cao, X. Li, S. Zhou, Z. Peng and J. Zeng, *Angew. Chem. Int. Ed.*, 2017, **56**, 328-332.
13. H. Jin, S. Mao, G. Zhan, F. Xu, X. Bao and Y. Wang, *J. Mater. Chem. A*, 2017, **5**, 1078-1084.
14. T. Yoon and K. S. Kim, *Adv. Funct. Mater.*, 2016, **26**, 7386-7393.
15. L. Zhuang, L. Ge, Y. Yang, M. Li, Y. Jia, X. Yao and Z. Zhu, *Adv. Mater.*, 2017, **29**, 1606793.
